# Supplementary material
Source: PubMed Central journal article supplement (PMC4079727)

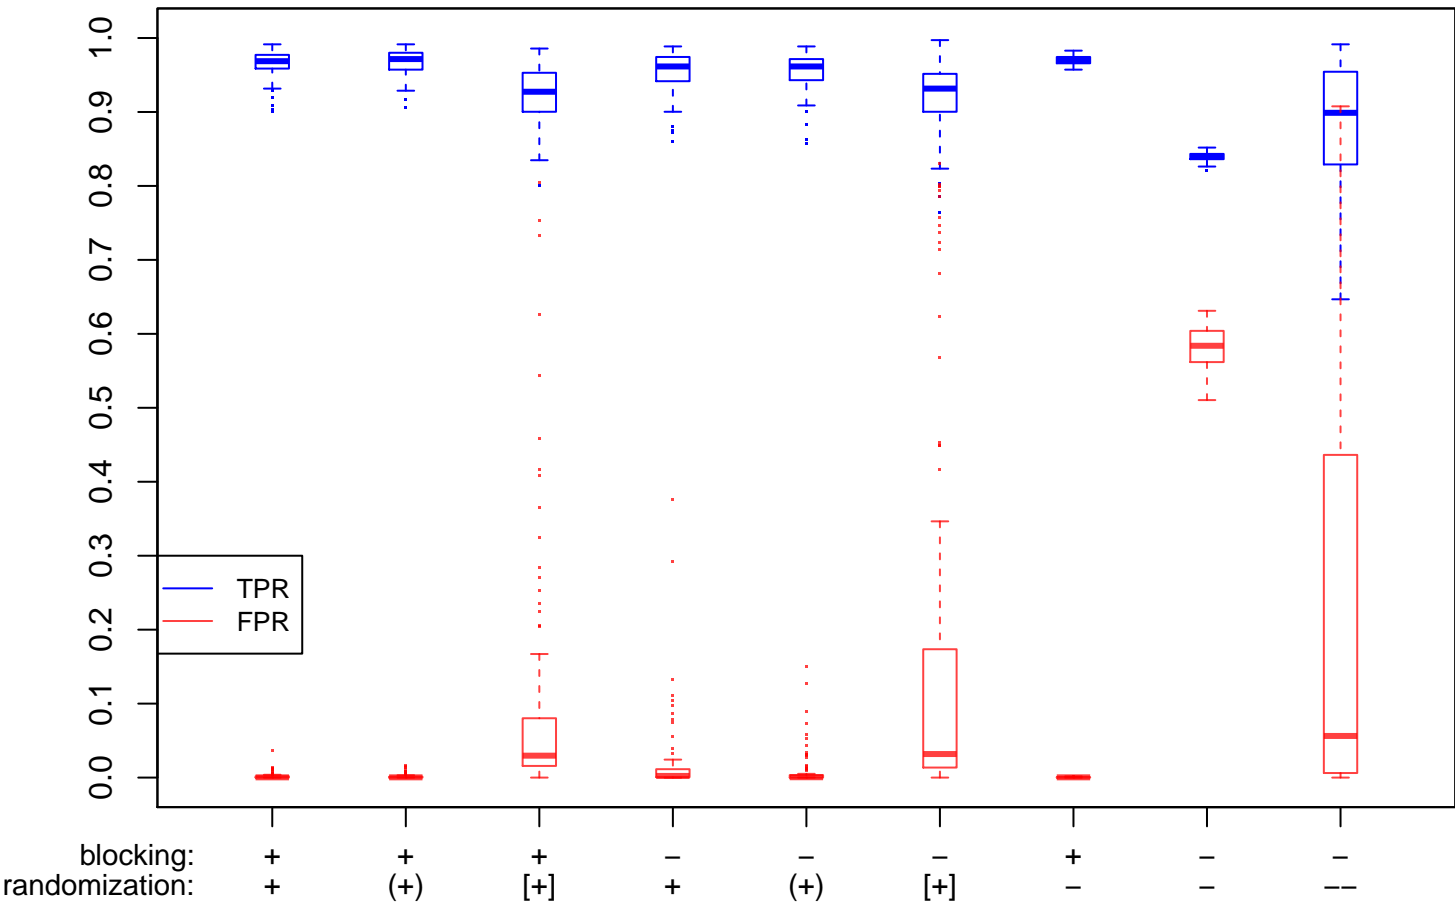

Supplement: NIHMS588436-supplement-4.pdf [file NIHMS588436-supplement-4.pdf]

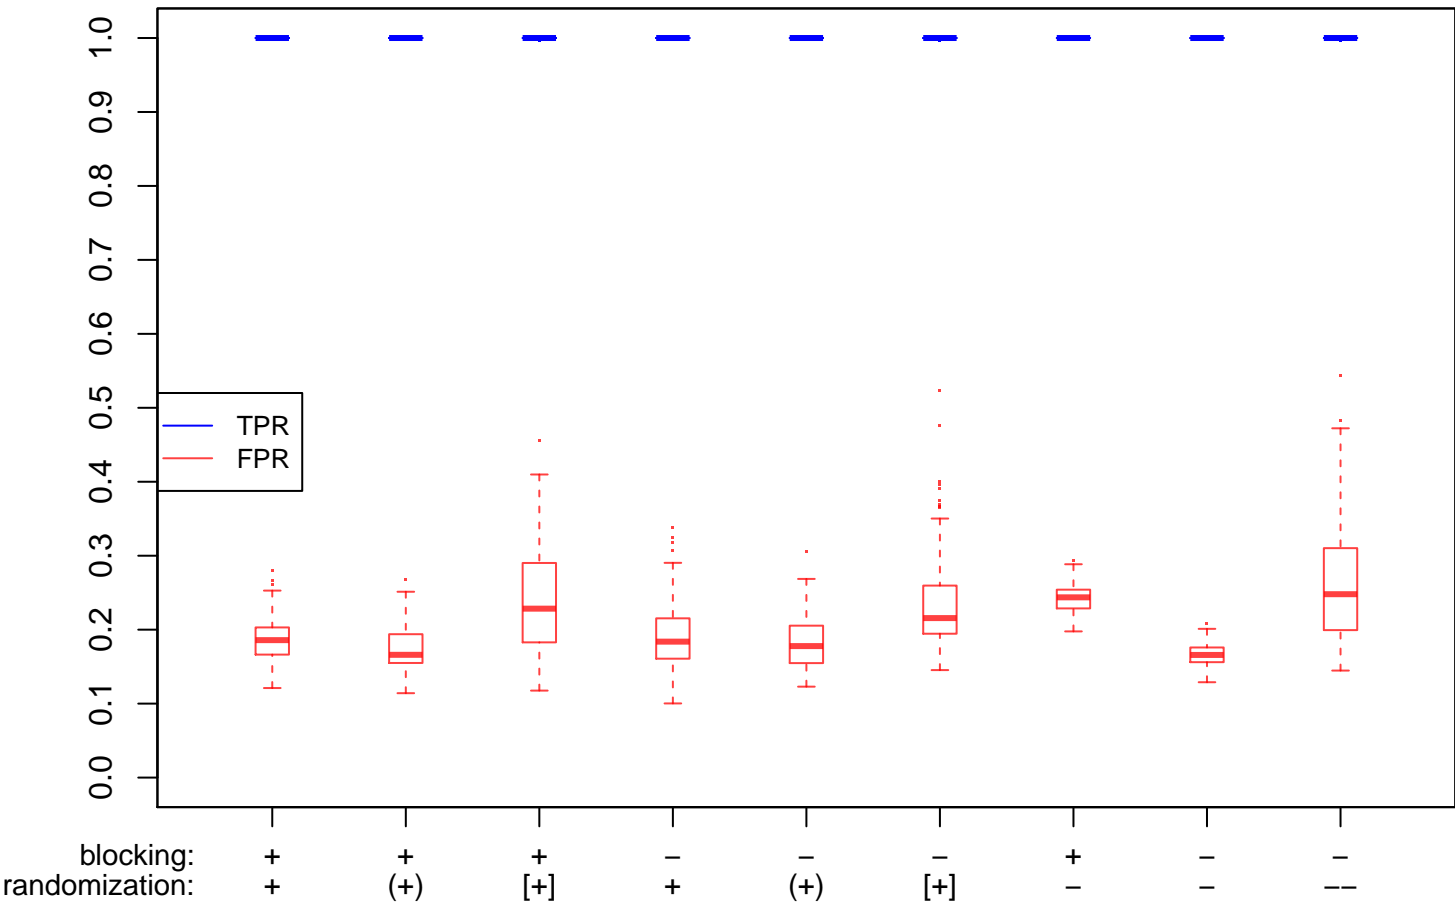

Supplement: NIHMS588436-supplement-5.pdf [file NIHMS588436-supplement-5.pdf]

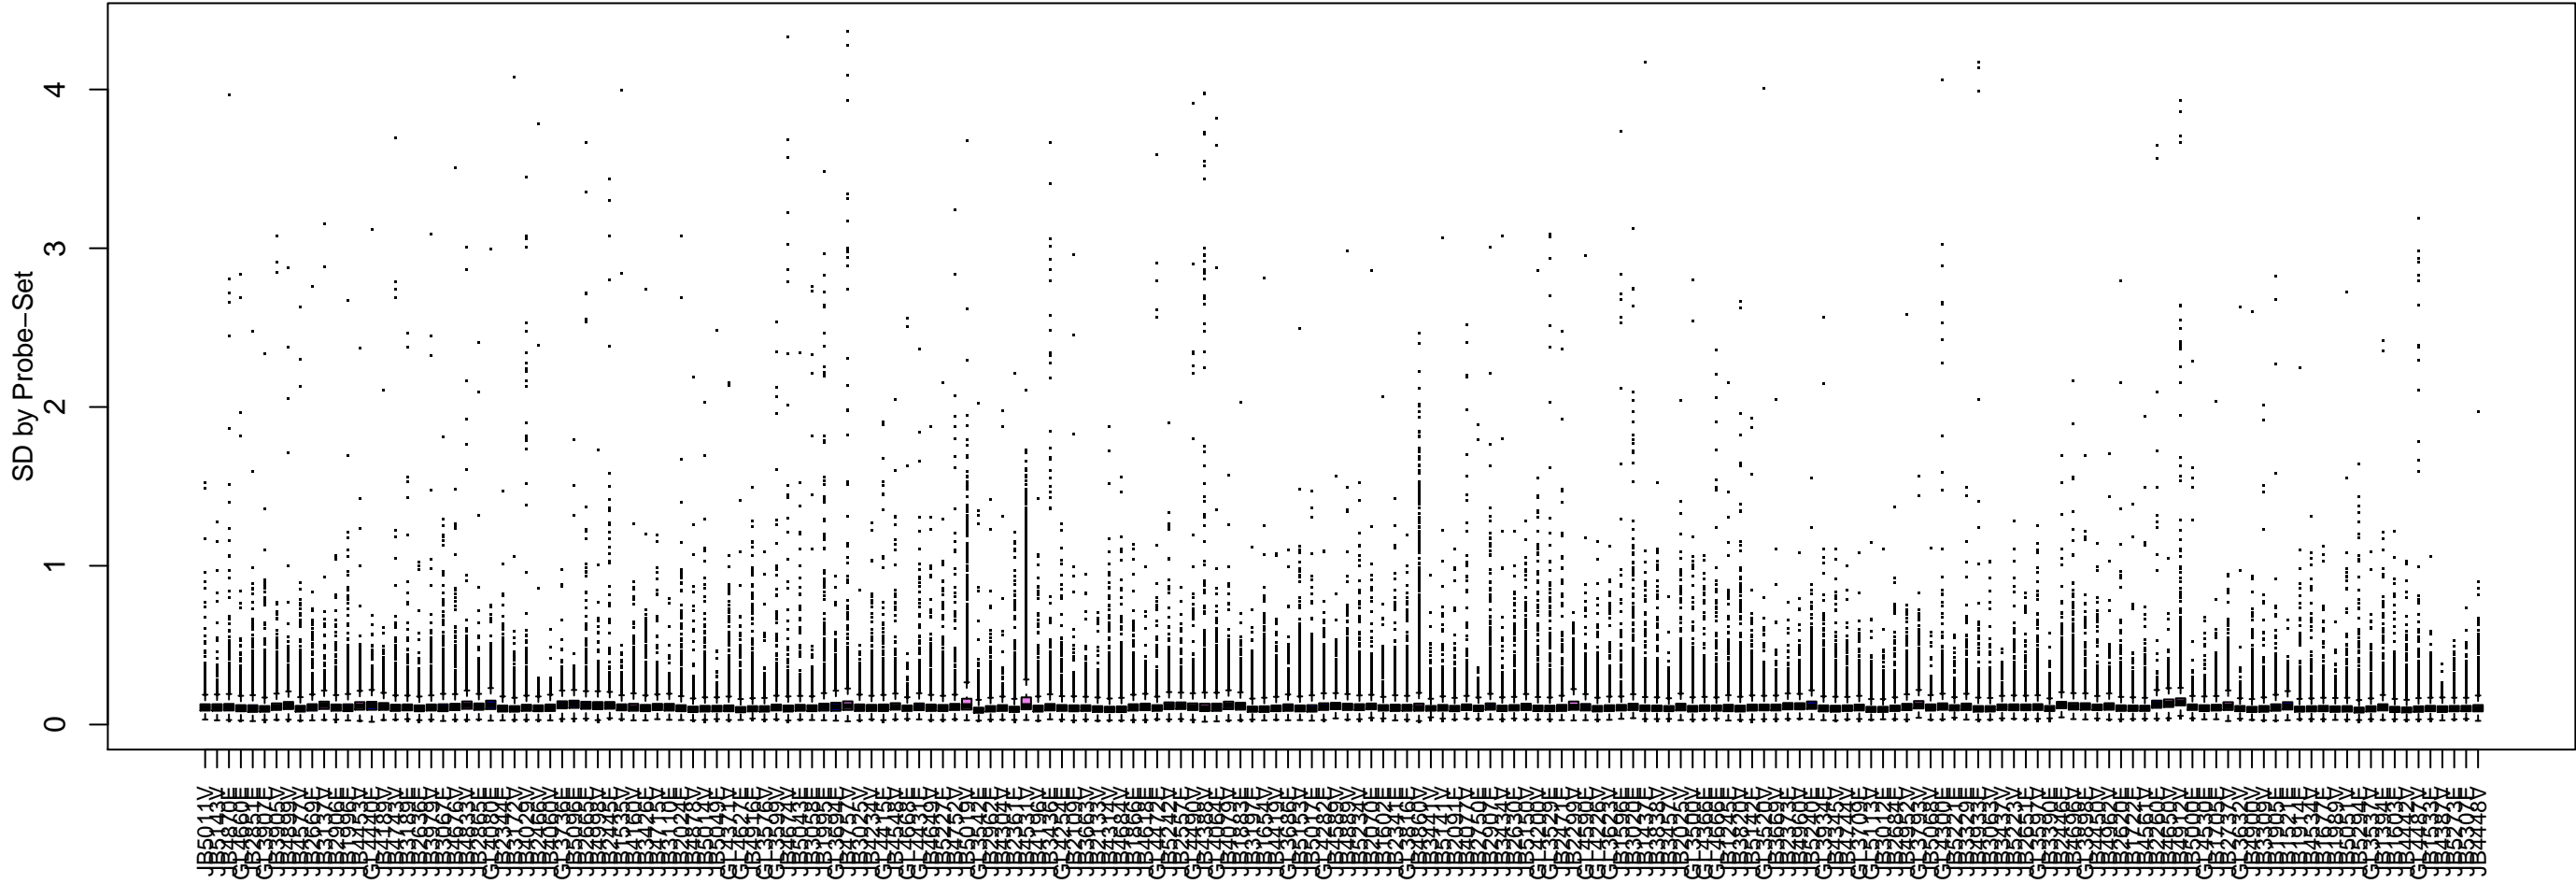

Supplement: NIHMS588436-supplement-6.pdf [file NIHMS588436-supplement-6.pdf]
